# Supplementary material for: Construction of an Early Risk Warning Model of Organizational Resilience: An Empirical Study Based on Samples of R&D Teams
Source: Hindawi journal article supplement (doi:10.1155/2016/4602870), 2016-01-01
Supplement: f1 [file 4602870.f1.pdf]

## **Organizational Resilience Questionnaire**

Dear Sir / Madam:

Hello!

First of all, thank you very much for taking the time to fill in this questionnaire!

We are doing a research project on " Organizational Resilience ". Through your answers to the following questions, it can help us in-depth study of factors affecting Organizational Resilience. We assure you: This survey results for research purposes only and strictly confidential. Please fill in your enterprise information according to the actual situation.

Thank you for your support and cooperation!

---- Jiangxi University of

Finance and Economics

## Questionnaire

| According to the actual condition, please play “√” in the appropriate option. Fully in line with (the highest) of 5 points, the total not comply with (minimum) for 1 point and so on. | strong                     | good                       | general                    | fairly weak                | weak                       |
|----------------------------------------------------------------------------------------------------------------------------------------------------------------------------------------|----------------------------|----------------------------|----------------------------|----------------------------|----------------------------|
| <b>Shared Vision</b>                                                                                                                                                                   |                            |                            |                            |                            |                            |
| You set up the long term career development goals and are psychologically prepared for the future setbacks.                                                                            | <input type="checkbox"/> 5 | <input type="checkbox"/> 4 | <input type="checkbox"/> 3 | <input type="checkbox"/> 2 | <input type="checkbox"/> 1 |
| You believe if you work together, the difficulty is temporary.                                                                                                                         | <input type="checkbox"/> 5 | <input type="checkbox"/> 4 | <input type="checkbox"/> 3 | <input type="checkbox"/> 2 | <input type="checkbox"/> 1 |
| Your personal success depends on the development of your company                                                                                                                       | <input type="checkbox"/> 5 | <input type="checkbox"/> 4 | <input type="checkbox"/> 3 | <input type="checkbox"/> 2 | <input type="checkbox"/> 1 |
| You have clear personal goals and responsibilities.                                                                                                                                    | <input type="checkbox"/> 5 | <input type="checkbox"/> 4 | <input type="checkbox"/> 3 | <input type="checkbox"/> 2 | <input type="checkbox"/> 1 |
| <b>Willingness to Learn</b>                                                                                                                                                            |                            |                            |                            |                            |                            |
| You participate in learning to acquire new knowledge to cope with stress                                                                                                               | <input type="checkbox"/> 5 | <input type="checkbox"/> 4 | <input type="checkbox"/> 3 | <input type="checkbox"/> 2 | <input type="checkbox"/> 1 |
| You actively strive for learning opportunities to enhance professional skills                                                                                                          | <input type="checkbox"/> 5 | <input type="checkbox"/> 4 | <input type="checkbox"/> 3 | <input type="checkbox"/> 2 | <input type="checkbox"/> 1 |
| You can quickly renew your skills and knowledge based on the changes of your company                                                                                                   | <input type="checkbox"/> 5 | <input type="checkbox"/> 4 | <input type="checkbox"/> 3 | <input type="checkbox"/> 2 | <input type="checkbox"/> 1 |
| You are willing to learn working skills and knowledge from your colleagues.                                                                                                            | <input type="checkbox"/> 5 | <input type="checkbox"/> 4 | <input type="checkbox"/> 3 | <input type="checkbox"/> 2 | <input type="checkbox"/> 1 |
| <b>Adaptation Ability</b>                                                                                                                                                              |                            |                            |                            |                            |                            |
| Combining originality and initiative to capitalize on an immediate situation                                                                                                           | <input type="checkbox"/> 5 | <input type="checkbox"/> 4 | <input type="checkbox"/> 3 | <input type="checkbox"/> 2 | <input type="checkbox"/> 1 |
| You can accept the change of working place and organization                                                                                                                            | <input type="checkbox"/> 5 | <input type="checkbox"/> 4 | <input type="checkbox"/> 3 | <input type="checkbox"/> 2 | <input type="checkbox"/> 1 |
| When facing a difficulty, you can make plan to deal with it.                                                                                                                           | <input type="checkbox"/> 5 | <input type="checkbox"/> 4 | <input type="checkbox"/> 3 | <input type="checkbox"/> 2 | <input type="checkbox"/> 1 |
| <b>Cooperative Awareness</b>                                                                                                                                                           |                            |                            |                            |                            |                            |
| Sharing information and knowledge widely                                                                                                                                               | <input type="checkbox"/> 5 | <input type="checkbox"/> 4 | <input type="checkbox"/> 3 | <input type="checkbox"/> 2 | <input type="checkbox"/> 1 |
| Developing interpersonal connections and resource supply lines that lead to the ability to act quickly                                                                                 | <input type="checkbox"/> 5 | <input type="checkbox"/> 4 | <input type="checkbox"/> 3 | <input type="checkbox"/> 2 | <input type="checkbox"/> 1 |
| Sharing power and accountability                                                                                                                                                       | <input type="checkbox"/> 5 | <input type="checkbox"/> 4 | <input type="checkbox"/> 3 | <input type="checkbox"/> 2 | <input type="checkbox"/> 1 |
| When you encounter a difficult situation, you actively seek help from others.                                                                                                          | <input type="checkbox"/> 5 | <input type="checkbox"/> 4 | <input type="checkbox"/> 3 | <input type="checkbox"/> 2 | <input type="checkbox"/> 1 |

| <b>Work Enthusiasm</b>                                                      |                            |                            |                            |                            |                            |
|-----------------------------------------------------------------------------|----------------------------|----------------------------|----------------------------|----------------------------|----------------------------|
| You work enthusiastically and have the courage to overcome various problems | <input type="checkbox"/> 5 | <input type="checkbox"/> 4 | <input type="checkbox"/> 3 | <input type="checkbox"/> 2 | <input type="checkbox"/> 1 |
| You like your work. Even when you meet difficulties, you never have fears.  | <input type="checkbox"/> 5 | <input type="checkbox"/> 4 | <input type="checkbox"/> 3 | <input type="checkbox"/> 2 | <input type="checkbox"/> 1 |
| Even when facing pressure, you still have great enthusiasm to work          | <input type="checkbox"/> 5 | <input type="checkbox"/> 4 | <input type="checkbox"/> 3 | <input type="checkbox"/> 2 | <input type="checkbox"/> 1 |
